# Supplementary material for: From pathogen to a commensal: modification of the Microbacterium nematophilum–Caenorhabditis elegans interaction during chronic infection by the absence of host insulin signalling
Source: PubMed Central journal article supplement (PMC7561485; doi:10.1242/bio.053504), 2020-10-07
Supplement: biolopen-9-053504-s1.pdf [file biolopen-9-053504-s1.pdf]

| Group      | Genotype               | CBX102 colonisation Day-2 adult | TD50 CBX102 25°C | p-value | Health CBX102 Day-1 adult (BBPS) | p-value |
|------------|------------------------|---------------------------------|------------------|---------|----------------------------------|---------|
| <b>A*</b>  | <i>sek-1 (ag1)</i>     | +++                             | 5                | <0.0001 | 0.5194                           | 0.0001  |
|            | <i>nsy-1 (ag3)</i>     | ++                              | 5                | <0.001  |                                  |         |
|            | <i>pmk-1 (km25)</i>    | ++                              | 5                | <0.001  |                                  |         |
|            | <i>lys-7 (ok1384)</i>  | +++                             | 5                | <0.0001 | 0.9708                           | 0.0001  |
|            | <i>phm-2 (ad597)</i>   | +++                             | 5                | <0.0001 |                                  |         |
|            | <i>hsf-1 (sy411)</i>   | +++                             | 5                | <0.0001 |                                  |         |
| <b>B*</b>  | <i>llys-3 (ok3222)</i> |                                 |                  |         |                                  |         |
|            | <i>bar-1 (nu63)</i>    | +++                             | 7                | 0.0166  |                                  |         |
|            | <i>cep-1 (gk138)</i>   | +++                             | 7                | 0.0031  |                                  |         |
|            | <i>dbl-1 (nk3)</i>     | ++                              | 7                | 0.9149  |                                  |         |
|            | <i>vhl-1 (ok161)</i>   | +++                             | 7                | 0.006   |                                  |         |
|            | <i>sur-2 (e2706)</i>   | ++                              | 8                | 0.9578  |                                  |         |
|            | <i>eat-2 (ad465)</i>   | ++                              | 6                | 0.191   |                                  |         |
|            | <i>kqb-1 (mu3)</i>     | +++                             | 7                | 0.7053  |                                  |         |
| <b>C**</b> | <i>N2 (wild type)</i>  |                                 |                  |         |                                  |         |
|            | <i>sqt-3 (e24)</i>     | ++                              | 8                | 0.5673  |                                  |         |
|            | <i>sqt-3 (e2117)</i>   | ++                              | 9                | 0.5201  | 0.8253                           | 0.4641  |
|            | <i>ced-1 (e1735)</i>   | ++                              | 8                | 0.0793  |                                  |         |
| <b>D**</b> | <i>daf-2 (e1370)</i>   | ++                              | 46               | <0.0001 | 1.261                            | 0.0001  |
|            | <i>age-1 (hx546)</i>   | +                               | 10               | <0.01   | 1.332                            | 0.0001  |
|            | <i>clk-1 (e2519)</i>   | +++                             | 14               | <0.0001 |                                  |         |
|            | <i>hif-1</i>           | ++                              | 10               | 0.0094  |                                  |         |

**Table S1.** Statistics for Lifespan and Health assays and mutants tested. For group categories see Fig. 2. WT is wild type (strain N2). Measurements: A\* and B\* relative to *llys-3* and C\*\* and D\*\* relative to the reference strain (N2). C. *elegans* mutants without a numerical value in the health column were not moving at all and therefore we were unable to film their vigour. All lifespan experiments above were done in parallel.

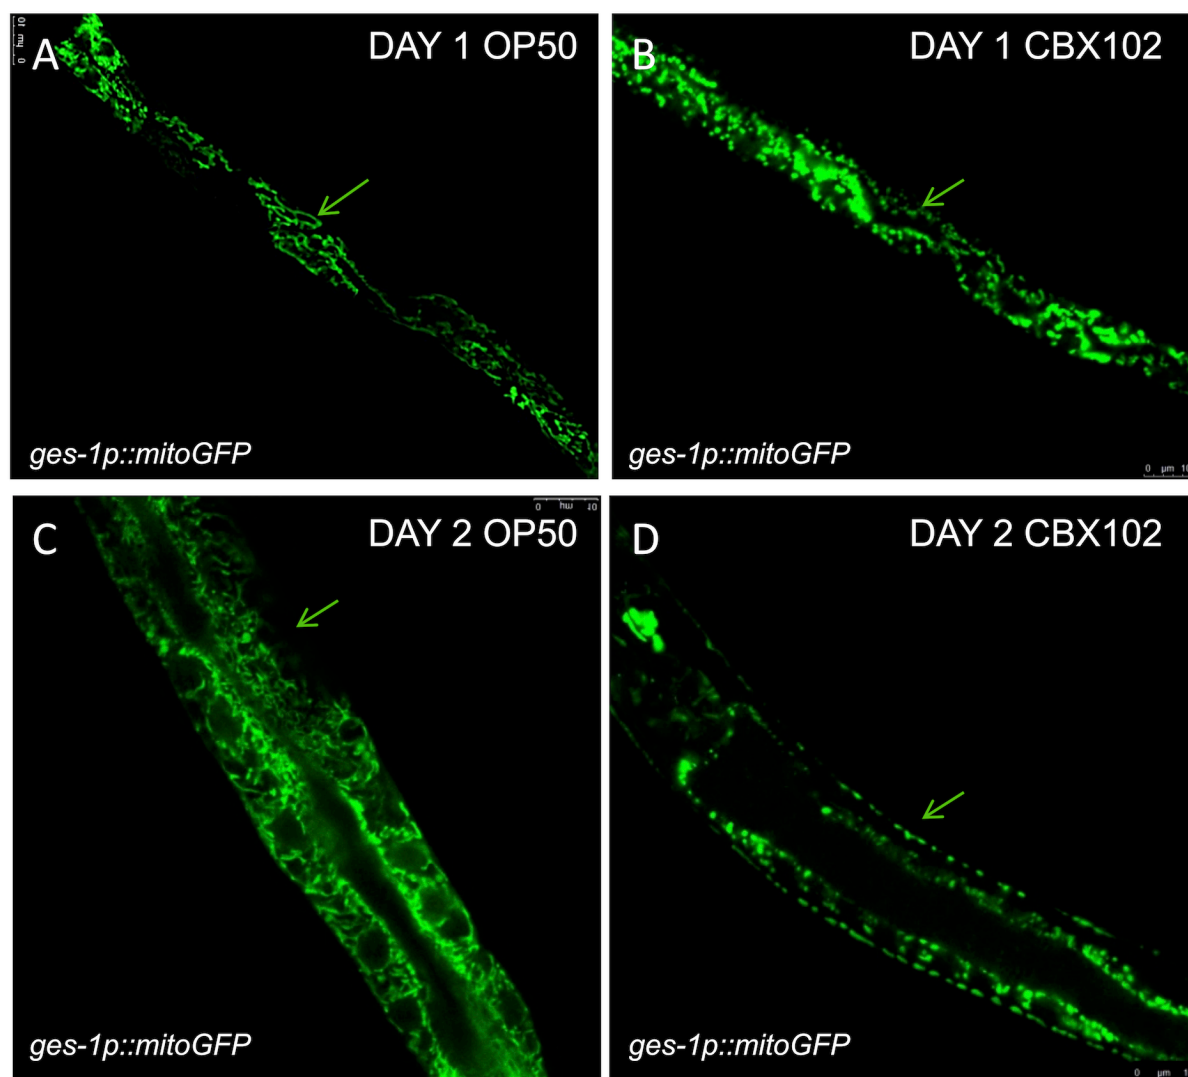

Fig S1

**FIGURE S1. *M. nematophilum* CBX102 accelerates ageing.** Representative images from animals expressing the mitochondria marker *mito-GFP* in the intestine (A), (C) in OP50 showing normal tubular mitochondria (arrows) while age-matched (B), (D) CBX102-grown Day-1 and Day-2 animals show fragmented mitochondria (arrows) with irregular shape. N=25 per treatment. Results are from 3 independent experiments.

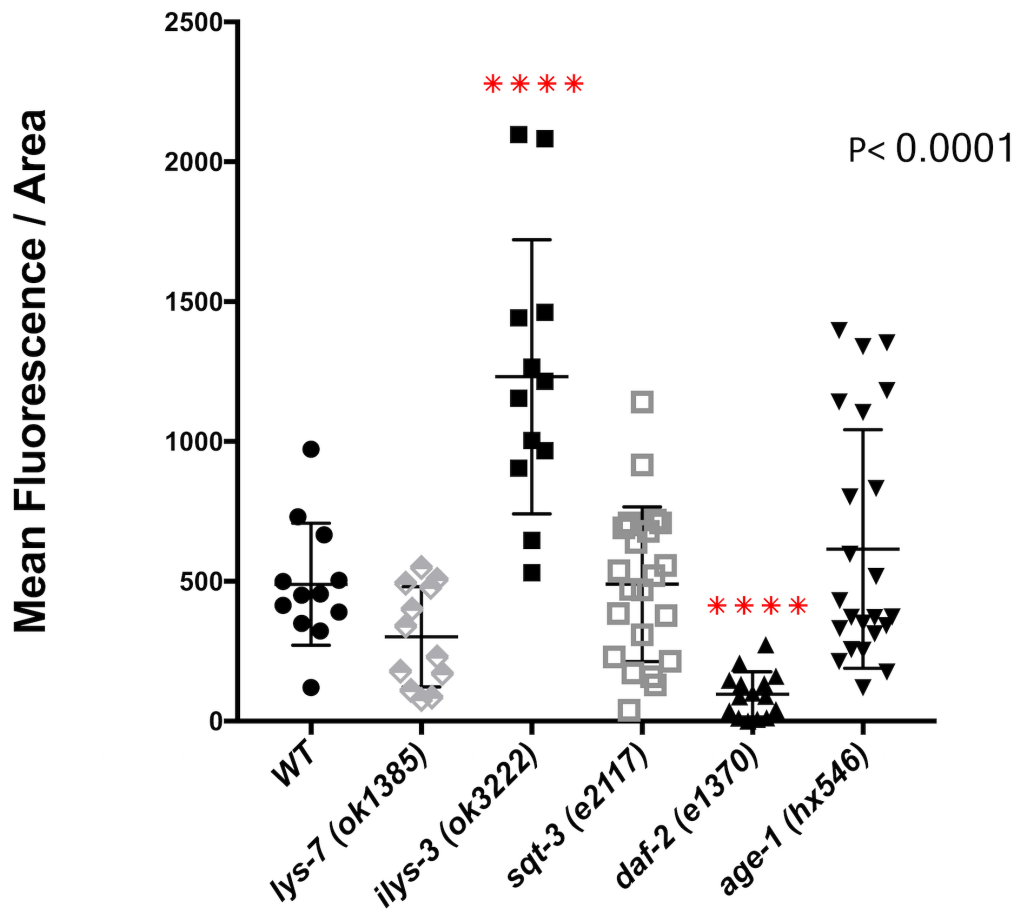

Fig S2

**FIGURE S2. Quantification of bacterial colonisation of CBX102 in *C. elegans* mutants.**

Each dot represents a 1-day adult animal with SYTO13 fluorescence counted. *M. nematophilum* strain CBX102 displayed less colonisation in *daf-2* compared to N2 (designated as wild-type of WT). In contrast, mutants lacking the antimicrobial *ilys-3* gene, displayed significantly increased colonisation. Dunnett's-multiple comparisons one-way ANOVA test was performed. \*\*\*\* $P < 0.0001$ ; except comparisons with *ilys-3* and *daf-2*, all other comparisons were not significant.

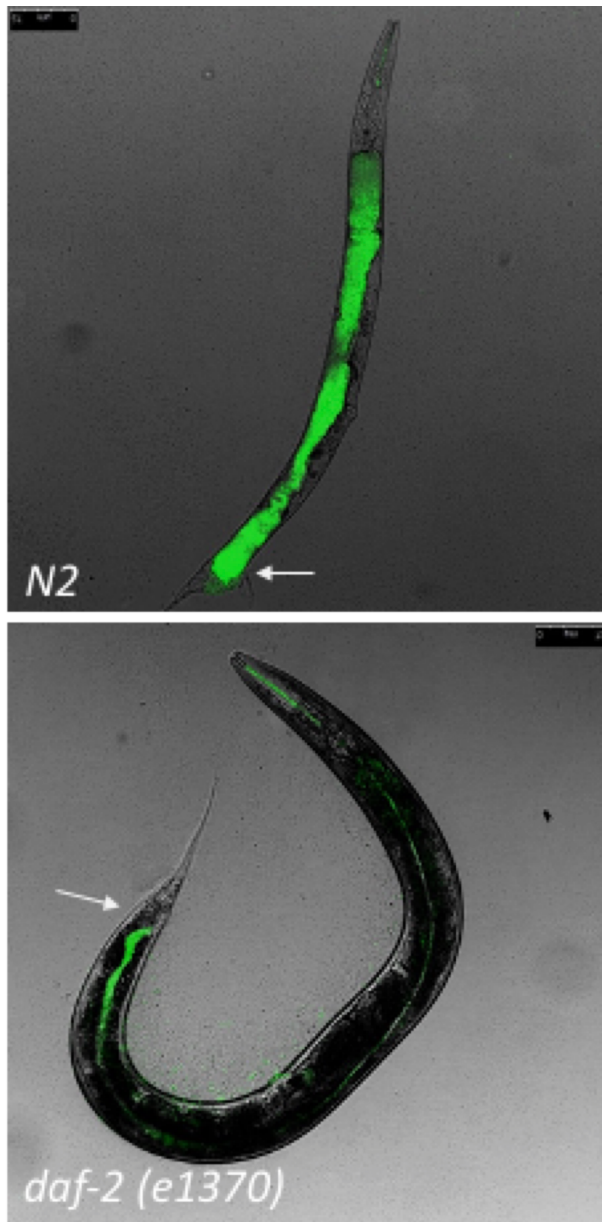

**Fig S3**

**FIGURE S3. Tail swelling and colonisation when N2 and *daf-2* grow in CBX102.**

Representative images of worms 10 days after bleaching of L1. In comparison to N2 *daf-2* were found to have no tail swelling (arrows) and reduced intestinal colonisation. We looked at 25 worms per genotype per treatment in 3 independent experiments.

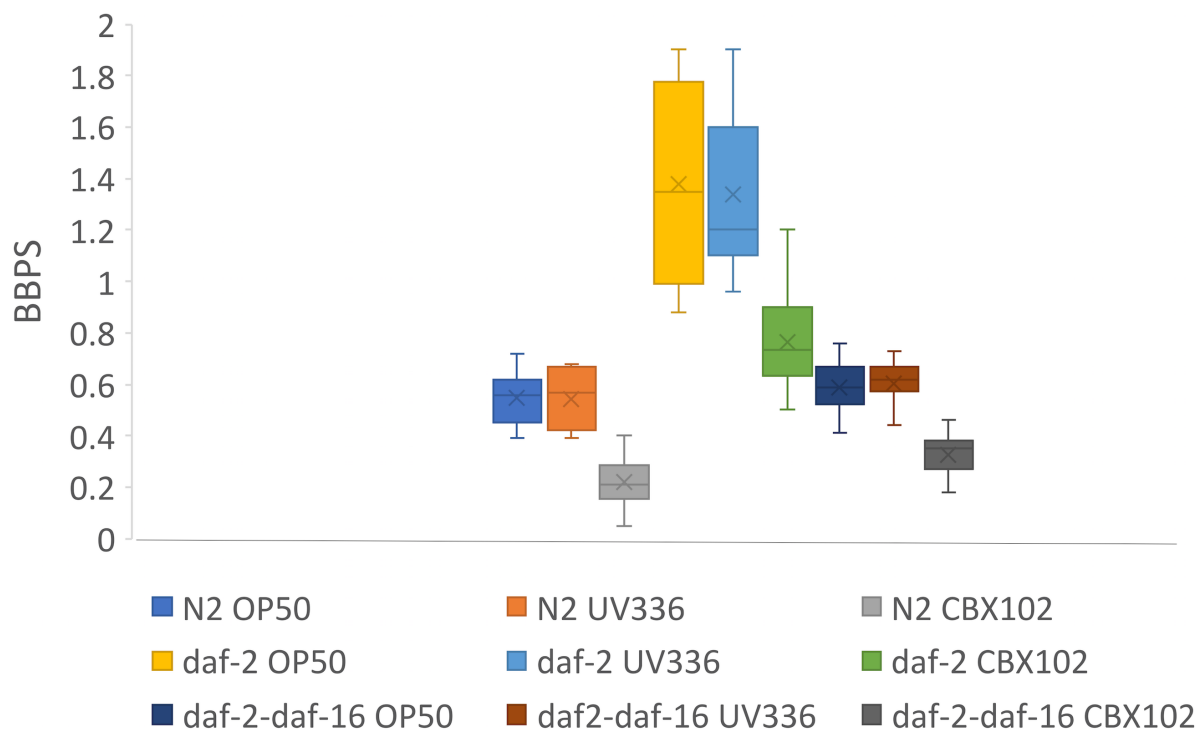

Fig S4

**FIGURE S4. Health of animals with different microbiota.** Box plot represents body bends per second (BBPS) counted per animal for each strain. Each box represents a group of 1-day adult animals ( $n=25$ ). Dunnett's-multiple comparisons one-way ANOVA test was performed showing that CBX102 was always significantly lower across the same host genotypes ( $p<0.0001$ ) while *daf-2* was significantly higher than N2 across bacterial strains ( $p<0.0001$ ). Comparison between *daf2* and *daf-16*, *daf-2* showed significant difference ( $p<0.0001$ ) across the different bacteria while N2 and *daf-16*, *daf-2* were statistically indistinguishable ( $p>0.1$ ).

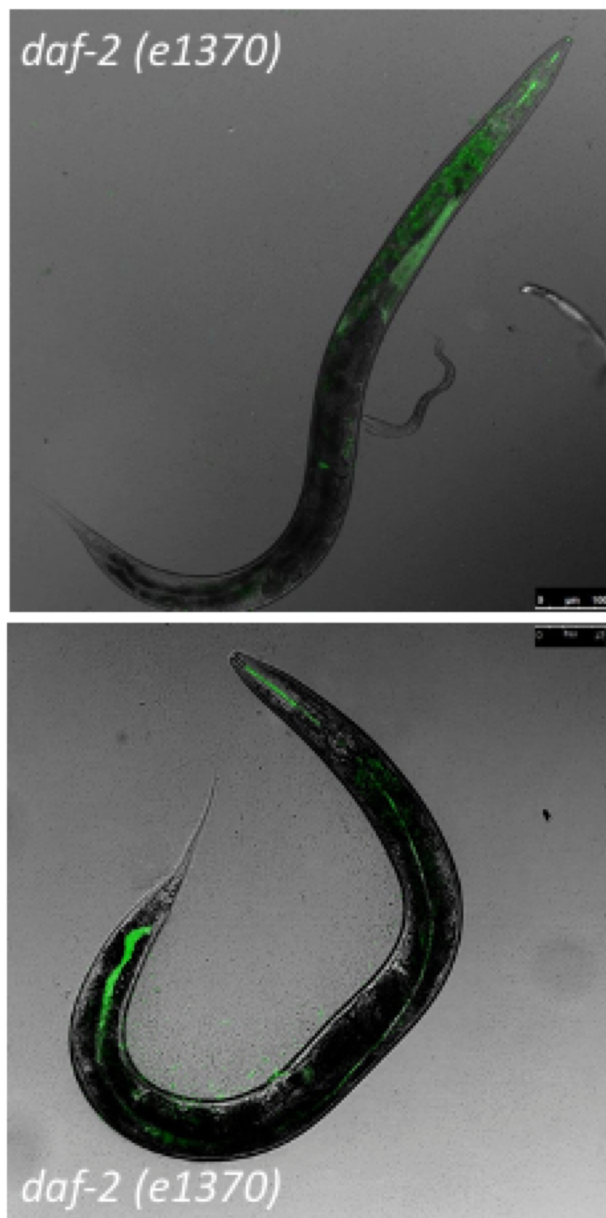

**Fig S5**

**FIGURE S5. Colonisation of OP50 and CBX102 in *daf-2*.** Both bacterial species hardly colonised the gut of *daf-2* mutants opening up the possibility that these worms ate less. Representative images of worms 10 days after bleaching of L1. We looked at 25 worms per genotype per treatment in 3 independent experiments.
